# Supplementary material
Source: PubMed Central journal article supplement (PMC7923607)
Supplement: pnas.2019158118.sapp.pdf [file pnas.2019158118.sapp.pdf]

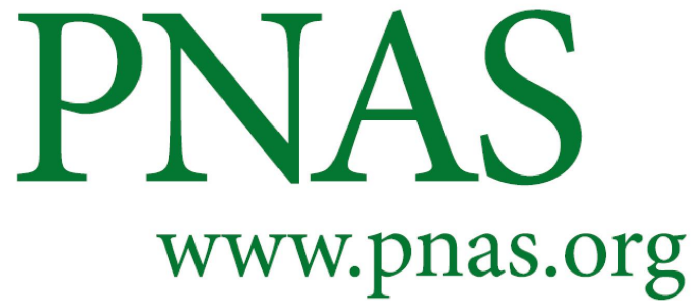

## Appendix for

Ancient DNA and multi-method dating confirm the late arrival of anatomically modern humans in southern China

Xue-feng Sun<sup>1,\*</sup>, Shao-qing Wen<sup>2</sup>, Cheng-qiu Lu<sup>3</sup>, Bo-yan Zhou<sup>2</sup>, Darren Curnoe<sup>4\*</sup>, Hua-yu Lu<sup>1</sup>, Hong-chun Li<sup>5</sup>, Wei Wang<sup>6</sup>, Hai Cheng<sup>7</sup>, Shuang-wen Yi<sup>1</sup>, Xin Jia<sup>8</sup>, Pan-xin Du<sup>2</sup>, Xing-hua Xu<sup>1</sup>, Yi-ming Lu<sup>1</sup>, Ying Lu<sup>1</sup>, Hong-xiang Zheng<sup>2</sup>, Hong Zhang<sup>2</sup>, Chang Sun<sup>2</sup>, Lan-hai Wei<sup>2</sup>, Fei Han<sup>9</sup>, Juan Huang<sup>10</sup>, R. Lawrence Edwards<sup>11</sup>, Li Jin<sup>2</sup>, Hui Li<sup>2,12\*</sup>

<sup>1</sup>School of Geography and Ocean Science, Nanjing University, Nanjing, 210023, China.

<sup>2</sup>School of Life Sciences and Institute of Archaeological Science, Fudan University, Shanghai 200438, China.

<sup>3</sup>Hubei Provincial Institute of Cultural Relics and Archaeology, Wuhan, 430077, China.

<sup>4</sup>Australian Museum Research Institute, Australian Museum, 1 William Street, Sydney, NSW 2010, Australia.

<sup>5</sup>Department of Geosciences, National Taiwan University, Taipei 106, Taiwan.

<sup>6</sup>Institute of Cultural Heritage, Shandong University, 72 Jimo-Binhai Road, Qingdao 266237, China.

<sup>7</sup>Institute of Global Environmental Change, Xi'an Jiaotong University, Xi'an 710049, China.

<sup>8</sup>School of Geography Science, Nanjing Normal University, Nanjing, 210023, China.

<sup>9</sup>Research Centre for Earth System Science, Yunnan University, Kunming, 650500, China.

<sup>10</sup>Cultural Relics Administration of Daoxian County, Daoxian 425300, China.

<sup>11</sup>Department of Geology and Geophysics, University of Minnesota, Minneapolis, Minnesota 55455, USA.

<sup>12</sup>Shanxi Academy of Advanced Research and Innovation, Fudan-Datong Institute of Chinese Origin, Datong, 037006, China.

\*Corresponding authors:

E-mail: xuefeng@nju.edu.cn; darrencurnoe@icloud.com; LHCA@fudan.edu.cn



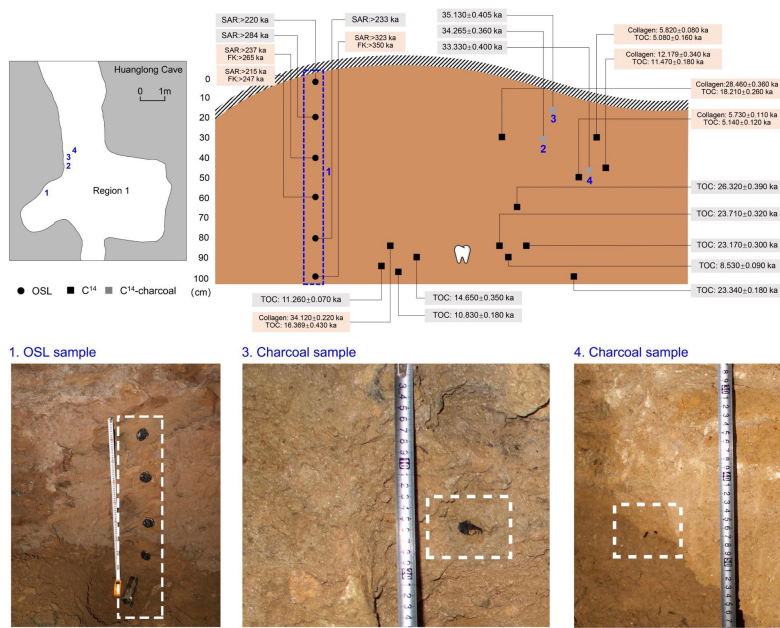

1. Huanglong Cave

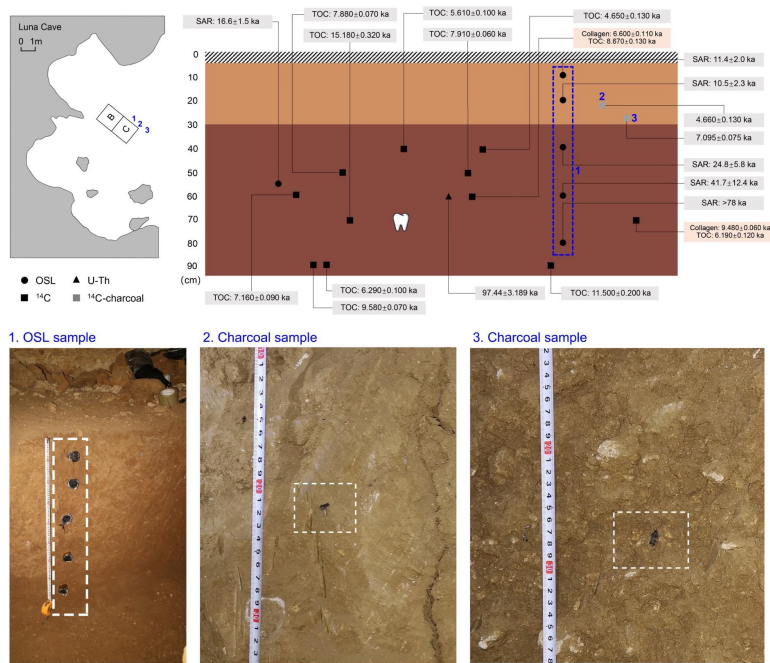

2. Luna Cave

**Figure S2.** Above: Huanglong Cave plan and stratigraphic sections showing dating results (above) and sampling locations for OSL dating and recovery location of charcoal used for AMS <sup>14</sup>C dating (below). Below: Luna Cave plan and stratigraphic sections sampled showing dating results (above) and sampling locations for OSL dating and recovery location of charcoal used for AMS <sup>14</sup>C dating (below).

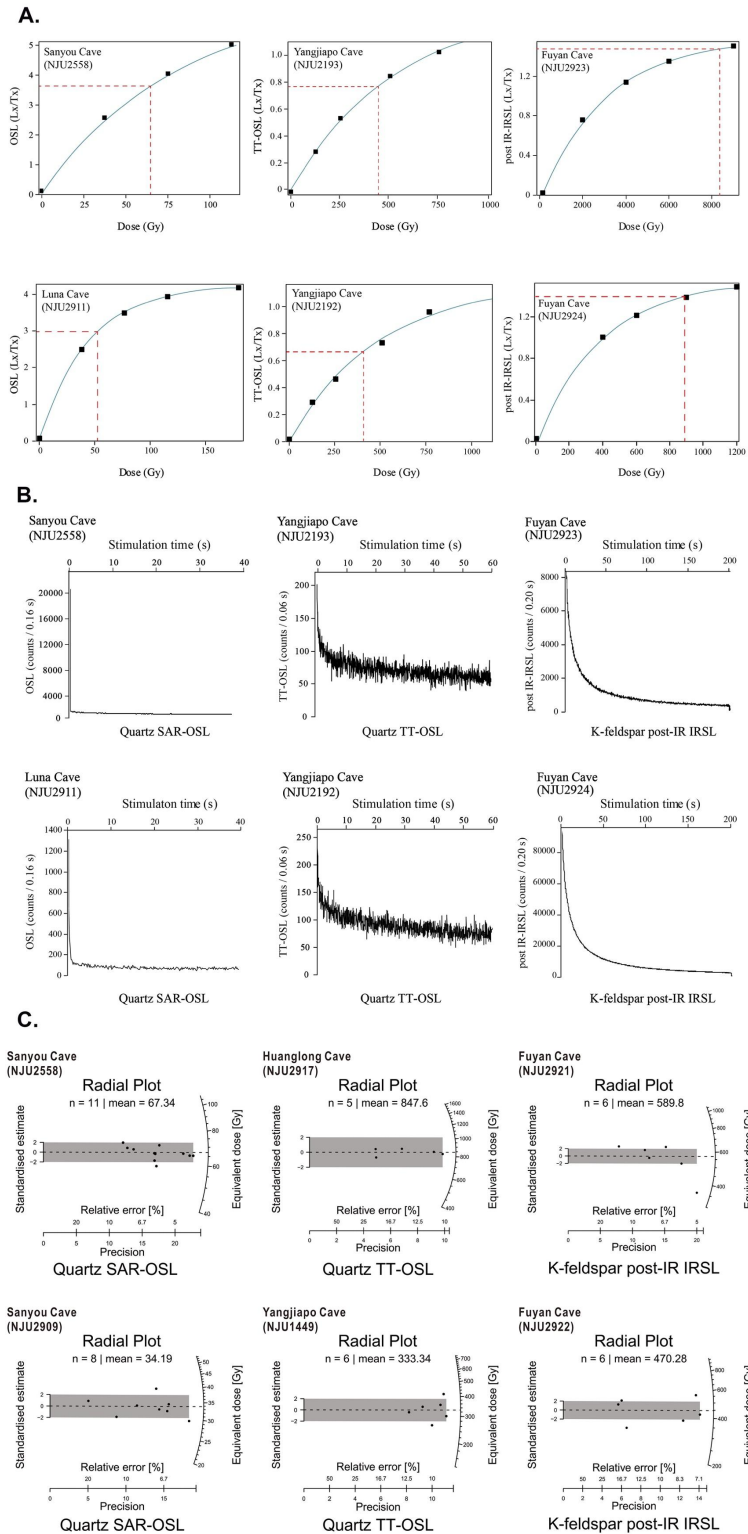

**Figure S3.** Results of Quartz SAR-OSL, Quartz TT-OSL, and feldspar pIRIR<sub>290</sub> dating. A. Representative growth curves. B. Representative decay curves. C. De values of aliquots plotted on radial plots.

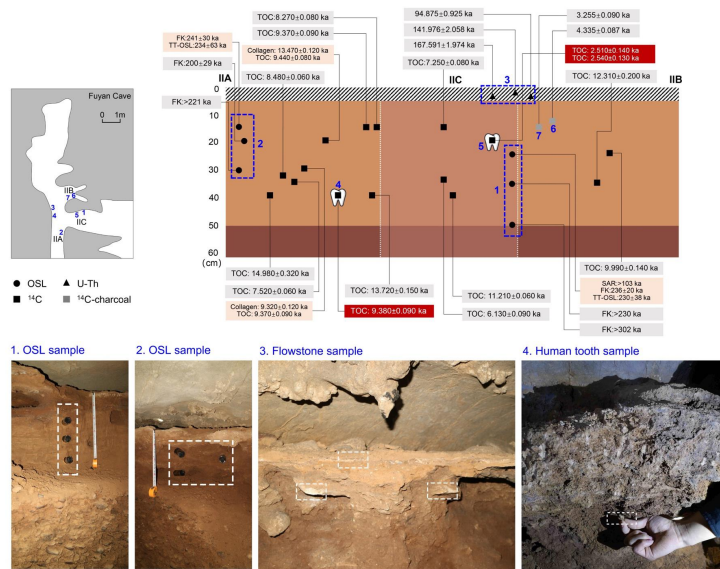

3. Fuyan Cave

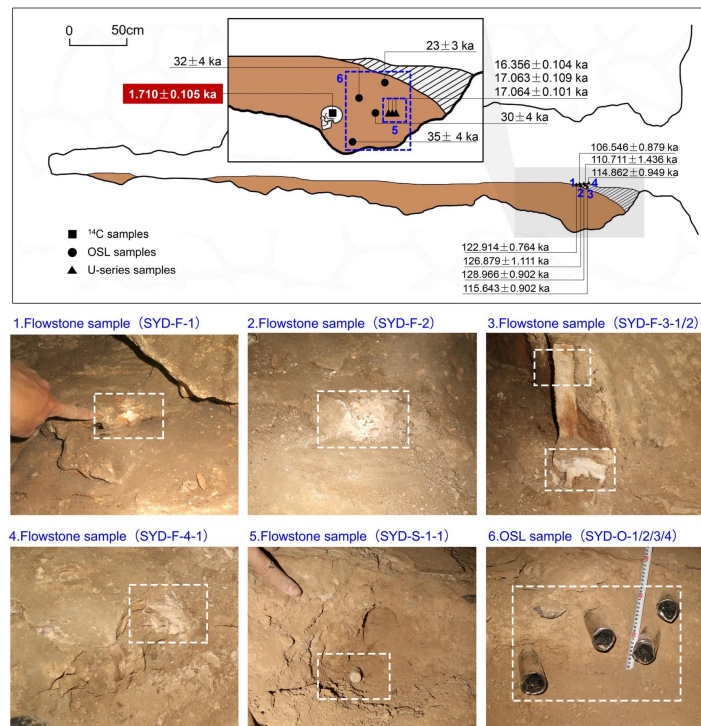

5. Sanyou Cave

**Figure S4.** Above: Fuyan Cave plan and stratigraphic sections showing dating results (above) and sampling locations for OSL dating, U-Th dating of flowstones and recovery location of human tooth used for AMS <sup>14</sup>C dating (below). Below: Sanyou Cave cross-section and mapped stratigraphic sections showing dating results (above), sampling locations for U-Th dating of flowstones (middle) and sampling locations for flowstone and OSL dating (below).

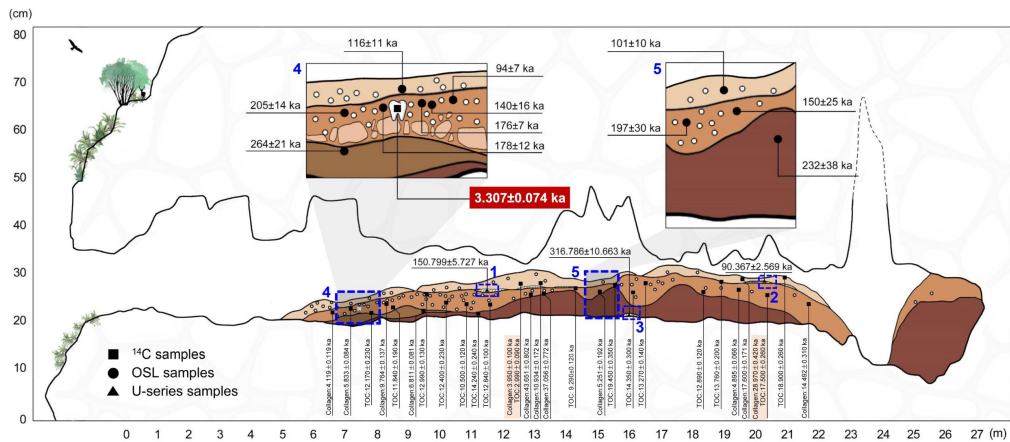

1.Flowstone sample (YJP-F-1)

2.Flowstone sample (YJP-F-2)

3.Flowstone sample (YJP-F-3)

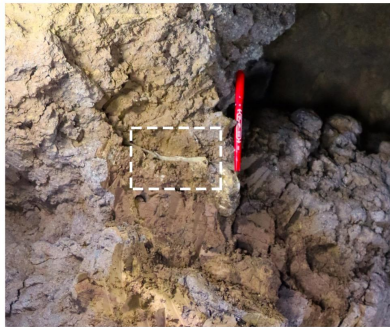

4.OSL sample (YJP-B)

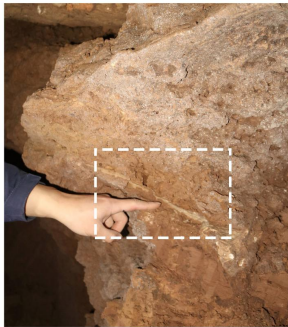

5.OSL sample (YJP-C)

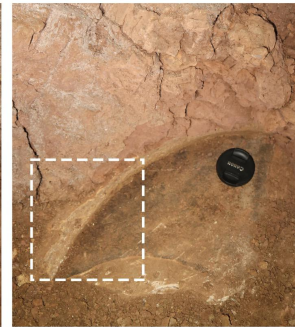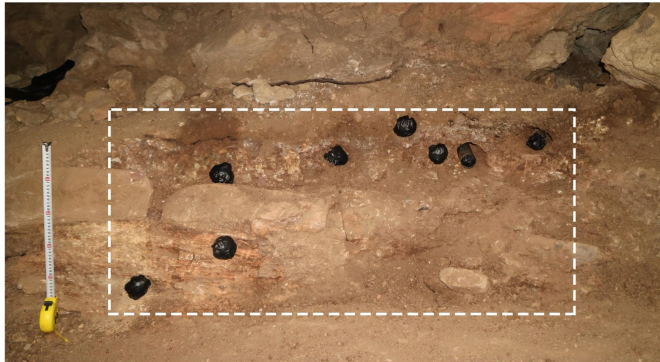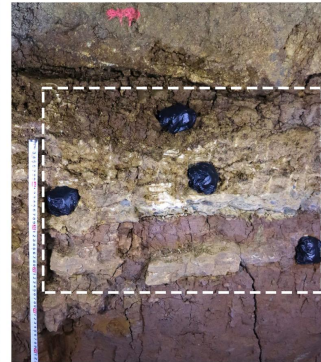

#### 4. Yangjiapo Cave

**Figure S5.** Yangjiapo Cave cross-section and mapped stratigraphic sections showing dating results (above), sampling locations for U-Th dating of flowstones (middle) and sampling locations for OSL dating (below).

**Table S1.** Summary of OSL dating results.

**A.** Summary of sample codes, radionuclide concentrations, dose rates, equivalent doses and Quartz SAR-OSL, Quartz TT-OSL, and feldspar pIRIR<sub>290</sub> ages for samples from Huanglong Cave (HLD), Luna Cave (LND) and Fuyan (FYD).

| Lab.N    | Sample N. | Depth(cm) | <sup>238</sup> U<br>(Bq kg <sup>-1</sup> ) | <sup>230</sup> Ra<br>(Bq kg <sup>-1</sup> ) | <sup>232</sup> Th<br>(Bq kg <sup>-1</sup> ) | <sup>40</sup> K<br>(Bq kg <sup>-1</sup> ) | W.C.(%) | Q-SAR-<br>De(Gy) | FK-<br>De(Gy) | TT-OSL-<br>De(Gy) | Q-Dose<br>rate(Gy/ka) | FK-Dose<br>rate(Gy/ka) | Q-SAR-<br>Age(ka) | FK-<br>Age(ka) | TT-OSL-<br>Age(ka) |
|----------|-----------|-----------|--------------------------------------------|---------------------------------------------|---------------------------------------------|-------------------------------------------|---------|------------------|---------------|-------------------|-----------------------|------------------------|-------------------|----------------|--------------------|
| NJU-2915 | HLD-0     | 0         | 33.7±6.0                                   | 22.2±0.4                                    | 22.2±0.4                                    | 345.1±6.8                                 | 39.33   | >349             | ---           | 977±50            | 1.60±0.26             | ---                    | >220              | ---            | ---                |
| NJU-2916 | HLD-20    | 20        | 21.4±5.6                                   | 15.3±0.4                                    | 10.8±0.3                                    | 188.3±4.7                                 | 34.85   | >267             | ---           | ---               | 0.94±0.14             | ---                    | >284              | ---            | ---                |
| NJU-2917 | HLD-40    | 40        | 30.8±6.3                                   | 17.8±0.4                                    | 24.6±0.4                                    | 296.2±6.3                                 | 46.60   | >328             | >487          | 848±33            | 1.38±0.25             | 1.84±0.15              | >237              | >265           | ---                |
| NJU-2918 | HLD-60    | 60        | 24.7±6.0                                   | 21.3±0.4                                    | 25.8±0.4                                    | 307.9±6.3                                 | 47.70   | >308             | >430          | 947±23            | 1.44±0.26             | 1.74±0.14              | >215              | >247           | ---                |
| NJU-2919 | HLD-80    | 80        | 38.1±6.2                                   | 17.1±0.4                                    | 18.4±0.3                                    | 215.3±5.2                                 | 31.97   | >299             | ---           | ---               | 1.28±0.18             | ---                    | >233              | ---            | ---                |
| NJU-2920 | HLD-100   | 100       | 29.0±5.3                                   | 14.9±0.4                                    | 13.8±0.3                                    | 131.6±3.8                                 | 24.90   | >320             | >512          | ---               | 0.99±0.12             | 1.46±0.18              | >323              | >350           | ---                |
| NJU-2910 | LND-A-10  | 10        | 59.8±7.3                                   | 32.4±0.6                                    | 73.2±0.7                                    | 88.0±3.3                                  | 10.50   | 24±4             | ---           | ---               | 2.09±0.15             | ---                    | 11.4±2.0          | ---            | ---                |
| NJU-2911 | LND-A-20  | 20        | 51.6±6.9                                   | 29.8±0.5                                    | 69.3±0.7                                    | 83.9±3.2                                  | 9.76    | 22±4             | ---           | ---               | 2.10±0.15             | ---                    | 10.5±2.3          | ---            | ---                |
| NJU-2912 | LND-A-40  | 40        | 55.3±7.0                                   | 33.4±0.5                                    | 72.6±0.7                                    | 87.7±3.2                                  | 15.22   | 51±11            | ---           | ---               | 2.08±0.14             | ---                    | 24.8±5.8          | ---            | ---                |
| NJU-2913 | LND-A-60  | 60        | 55.9±7.2                                   | 33.6±0.6                                    | 76.6±0.7                                    | 90.8±3.3                                  | 17.13   | 83±24            | ---           | ---               | 1.98±0.13             | ---                    | 41.7±12.4         | ---            | ---                |
| NJU-2914 | LND-A-80  | 80        | 50.8±6.9                                   | 28.4±0.5                                    | 71.3±0.7                                    | 74.9±3.1                                  | 18.83   | >146             | ---           | ---               | 1.86±0.12             | ---                    | >78               | ---            | ---                |
| NJU-2909 | LND-B-55  | 55        | 56.0±7.0                                   | 34.1±0.5                                    | 71.2±0.7                                    | 90.9±3.2                                  | 15.23   | 34±2             | ---           | ---               | 2.06±0.14             | ---                    | 16.6±1.5          | ---            | ---                |
| NJU-2921 | FYD-A-15  | 15        | 52.6±6.2                                   | 23.9±0.5                                    | 37.4±0.5                                    | 334.3±6.6                                 | 13.32   | ---              | 590±64        | 492±128           | 2.10±0.15             | 2.44±0.15              | ---               | 241±30         | 234±63             |
| NJU-2922 | FYD-A-20  | 20        | 50.2±6.1                                   | 25.4±0.5                                    | 35.0±0.4                                    | 305.8±6.2                                 | 12.17   | ---              | 470±61        | ---               | ---                   | 2.35±0.15              | ---               | 200±29         | ---                |
| NJU-2923 | FYD-A-30  | 30        | 48.6±6.2                                   | 26.2±0.5                                    | 41.1±0.5                                    | 388.7±7.3                                 | 14.57   | >234             | 622±35        | 528±79            | 2.30±0.16             | 2.64±0.16              | >103              | 236±20         | 230±38             |
| NJU-2924 | FYD-B-25  | 25        | 40.1±6.6                                   | 29.7±0.5                                    | 46.7±0.5                                    | 477.8±8.6                                 | 11.45   | ---              | >686          | ---               | ---                   | 3.10±0.20              | ---               | >221           | ---                |
| NJU-2925 | FYD-B-35  | 35        | 44.2±6.6                                   | 27.7±0.5                                    | 48.9±0.5                                    | 499.7±9.0                                 | 11.31   | ---              | >728          | 413±56            | 2.83±0.21             | 3.17±0.21              | ---               | >230           | ---                |
| NJU-2926 | FYD-B-50  | 50        | 28.2±5.9                                   | 23.5±0.4                                    | 38.6±0.5                                    | 369.4±7.0                                 | 9.38    | ---              | >768          | 375±202           | 2.20±0.16             | 2.54±0.16              | ---               | >302           | ---                |

Note: a. --- means poor signals and ages or no measurement; b. > means saturated.

**B.** Summary of sample codes, radionuclide concentrations, dose rates, equivalent doses and TT-OSL ages for samples from Yangjiapo Cave (YJP) and Sanyou Cave (SYD).

| Lab No.  | Sample No.      | Depth<br>(cm) | U(ppm)    | Th(ppm)   | K(%)      | WC (%) | N  | De(Gy) | Dose rate(Gy/ka) | Age(ka) |
|----------|-----------------|---------------|-----------|-----------|-----------|--------|----|--------|------------------|---------|
| NJU-1449 | YJP-B-layer1-1  | 15            | 2.91±0.10 | 14.9±0.40 | 1.51±0.06 | 18.07  | 6  | 333±25 | 2.87±0.14        | 116±11  |
| NJU-1451 | YJP-B-layer2-1  | 18            | 3.55±0.12 | 17.6±0.48 | 2.70±0.08 | 19.89  | 10 | 389±19 | 4.12±0.20        | 94±7    |
| NJU-1452 | YJP-B-layer2-2  | 27            | 2.14±0.09 | 10.8±0.30 | 1.12±0.05 | 5.99   | 9  | 424±14 | 2.41±0.13        | 176±7   |
| NJU-2191 | YJP-B-layer2-3  | 28            | 2.91±0.33 | 16.3±0.24 | 1.31±0.02 | 22.25  | 5  | 373±37 | 2.67±0.13        | 140±16  |
| NJU-2192 | YJP-B-layer 2-4 | 23            | 1.86±0.28 | 12.1±0.19 | 1.22±0.02 | 19.83  | 7  | 432±17 | 2.21±0.11        | 178±12  |
| NJU-2193 | YJP-B-layer 2-5 | 26            | 1.70±0.24 | 10.7±0.17 | 0.97±0.02 | 20.55  | 14 | 453±19 | 1.87±0.09        | 205±14  |
| NJU-2201 | YJP-B-layer3-1  | 45            | 2.69±0.32 | 14.5±0.22 | 1.16±0.02 | 20.85  | 6  | 494±29 | 2.43±0.12        | 264±21  |
| NJU-1453 | YJP-C-layer1-1  | 10            | 3.01±0.11 | 13.8±0.37 | 2.18±0.06 | 19.05  | 10 | 341±21 | 3.37±0.16        | 101±8   |
| NJU-1455 | YJP-C-layer2-1  | 25            | 2.48±0.10 | 11.5±0.32 | 1.03±0.04 | 19.18  | 10 | 321±19 | 2.14±0.10        | 150±12  |
| NJU-2194 | YJP-C-layer2-2  | 30            | 2.74±0.32 | 14.2±0.22 | 1.20±0.02 | 20.19  | 6  | 486±30 | 2.47±0.12        | 197±16  |
| NJU-2203 | YJP-C-layer4-1  | 38            | 1.53±0.23 | 9.83±0.16 | 0.96±0.02 | 18.71  | 6  | 720±57 | 3.10±0.15        | 232±22  |
| NJU-2555 | SYD-O-1         | 10            | 2.9±0.68  | 6.69±0.12 | 0.87±0.02 | 0.99   | 12 | 42±2   | 1.81±0.24        | 23±3    |
| NJU-2556 | SYD-O-2         | 15            | 2.0±0.60  | 6.77±0.12 | 0.91±0.02 | 2.16   | 12 | 54±3   | 1.68±0.20        | 32±4    |
| NJU-2557 | SYD-O-3         | 20            | 3.8±0.69  | 7.83±0.13 | 1.11±0.03 | 2.01   | 14 | 67±3   | 2.24±0.27        | 30±4    |
| NJU-2558 | SYD-O-4         | 30            | 2.5±0.62  | 7.45±0.12 | 1.11±0.03 | 2.07   | 11 | 67±2   | 1.93±0.23        | 35±4    |

**Table S2.** Results of all U-series dating of flowstone samples from Luna Cave (2), Fuyan Cave (3), Yangjiapo Cave (4) and Sanyou Cave (5) in the text and published U-series dating ages of flowstone samples from Huanglong Cave (1), Luna Cave(2) and Fuyan Cave (3).

| U ID               | <sup>238</sup> U<br>(ppb) | <sup>232</sup> Th<br>(ppt) | <sup>230</sup> Th / <sup>232</sup> Th<br>(atomic ×10 <sup>-6</sup> ) | δ <sup>234</sup> U*<br>(measured) | <sup>230</sup> Th / <sup>238</sup> U<br>(activity) | <sup>230</sup> Th Age<br>(yr)<br>(uncorrected) | <sup>230</sup> Th Age<br>(yr)<br>(corrected) | δ <sup>234</sup> U <sub>initial</sub> **<br>(corrected) | <sup>230</sup> Th Age<br>(yr BP)***<br>(corrected) | Layer | Depth<br>(cm) |
|--------------------|---------------------------|----------------------------|----------------------------------------------------------------------|-----------------------------------|----------------------------------------------------|------------------------------------------------|----------------------------------------------|---------------------------------------------------------|----------------------------------------------------|-------|---------------|
| <b>Luna Cave</b>   |                           |                            |                                                                      |                                   |                                                    |                                                |                                              |                                                         |                                                    |       |               |
| LND-2              | 55.7±0.1                  | 9365±188                   | 68±1                                                                 | 122.4±3.4                         | 0.691±0.0035                                       | 101803±1004                                    | 97508±3189                                   | 161±5                                                   | 97440±3189                                         | C-6   | 60            |
| <b>Fuyan Cave</b>  |                           |                            |                                                                      |                                   |                                                    |                                                |                                              |                                                         |                                                    |       |               |
| FY2-A-1            | 2198.4±12.2               | 12180±253                  | 2046±43                                                              | -47.8±2.9                         | 0.6875±0.0041                                      | 142218±2059                                    | 142044±2058                                  | -71±4                                                   | 141976±2058                                        | 1     | 2             |
| FY2-A-3            | 669.8±1.7                 | 29711±599                  | 267±5                                                                | 201.9±2.6                         | 0.7183±0.0022                                      | 95969±582                                      | 94943±925                                    | 264±3                                                   | 94875±925                                          | 1     | 4             |
| FY2-C              | 108.0±0.2                 | 11807±237                  | 156±3                                                                | 253.7±2.4                         | 1.0314±0.0022                                      | 169942±1162                                    | 167659±1974                                  | 407±5                                                   | 167591±1974                                        | 1     | 4             |
| <b>Yangjiapo</b>   |                           |                            |                                                                      |                                   |                                                    |                                                |                                              |                                                         |                                                    |       |               |
| YJP-FS-1           | 166.6±0.1                 | 82856±231                  | 34.0±0.7                                                             | 272.4±2.5                         | 1.0264±0.0020                                      | 161589±1024                                    | 150867±5727                                  | 418±8                                                   | 150799±5727                                        | 2     | 25            |
| YJP-FS-2           | 169.6±0.1                 | 42292±99                   | 55.3±1.7                                                             | 383.3±2.4                         | 0.8350±0.0015                                      | 95387±381                                      | 90425±2569                                   | 495±5                                                   | 90367±2569                                         | 2     | 15            |
| YJP-FS-3           | 84.4±0.1                  | 61175±167                  | 27.2±0.5                                                             | 192.9±2.8                         | 1.1973±0.0026                                      | 332229±6700                                    | 316854±10663                                 | 472±16                                                  | 316786±10663                                       | 4     | 60            |
| <b>Sanyou Cave</b> |                           |                            |                                                                      |                                   |                                                    |                                                |                                              |                                                         |                                                    |       |               |
| SYD-F-1            | 1611.3±4.1                | 5421±109                   | 4909±99                                                              | 415.4±2.3                         | 1.0018±0.0031                                      | 123042±763                                     | 122980±764                                   | 588±4                                                   | 122914±764                                         | 1     | 2             |
| SYD-F-2            | 5315.1±21.8               | 256±6                      | 358215±8017                                                          | 446.6±2.7                         | 1.0048±0.0047                                      | 126946±1111                                    | 126945±1111                                  | 639±4                                                   | 126879±1111                                        | 1     | 2             |
| SYD-F-3-1          | 1886.5±5.5                | 7202±146                   | 4469±91                                                              | 421.8±2.5                         | 1.0348±0.0035                                      | 129101±901                                     | 129032±902                                   | 607±4                                                   | 128966±902                                         | 1     | 2             |
| SYD-F-3-2          | 3712.0±14.0               | 2340±48                    | 25244±518                                                            | 414.0±2.6                         | 0.9651±0.0041                                      | 115721±902                                     | 115709±902                                   | 574±4                                                   | 115643±902                                         | 1     | 2             |
| SYD-F-4-1          | 1246.2±3.0                | 60983±1227                 | 321±6                                                                | 397.2±2.3                         | 0.9531±0.0030                                      | 115851±696                                     | 114928±949                                   | 549±3                                                   | 114862±949                                         | 1     | 2             |
| SYD-F-4-2          | 751.7±1.6                 | 73940±1486                 | 158±3                                                                | 408.2±2.2                         | 0.9452±0.0026                                      | 112629±601                                     | 110777±1436                                  | 558±4                                                   | 110711±1436                                        | 1     | 2             |
| SYD-F-5            | 3082.0±13.3               | 4152±85                    | 14383±296                                                            | 776.9±3.7                         | 1.1752±0.0056                                      | 106546±879                                     | 106527±879                                   | 1049±6                                                  | 1065461±879                                        | 1     | 2             |
| SYD-S-1-1          | 2856.6±10.8               | 12879±263                  | 814±17                                                               | 570.8±3.1                         | 0.2225±0.0010                                      | 16504±86                                       | 16422±104                                    | 598±3                                                   | 16356±104                                          | 1     | 20            |
| SYD-S-1-2          | 3671.6±16.6               | 10858±223                  | 1287±27                                                              | 569.9±3.6                         | 0.2309±0.0012                                      | 17182±102                                      | 17129±109                                    | 591±3                                                   | 17063±109                                          | 1     | 20            |
| SYD-S-1-3          | 3280.3±12.9               | 10614±216                  | 1172±24                                                              | 563.1±3.2                         | 0.2299±0.0010                                      | 17189±92                                       | 17130±101                                    | 519±4                                                   | 17064±101                                          | 1     | 20            |



**Huanglong Cave (Ref. 101)**

|      |    |    |    |    |    |    |               |    |    |   |     |
|------|----|----|----|----|----|----|---------------|----|----|---|-----|
| HL-1 | -- | -- | -- | -- | -- | -- | 103.739±1.616 | -- | -- | 3 | 100 |
| HL-2 | -- | -- | -- | -- | -- | -- | 103.119±1.348 | -- | -- | 3 | 100 |

**Huanglong Cave (Ref. 20)**

|                    |    |    |    |    |    |    |           |    |    |   |    |
|--------------------|----|----|----|----|----|----|-----------|----|----|---|----|
| <sup>a</sup> HLD-6 | -- | -- | -- | -- | -- | -- | 28.1±0.3  | -- | -- | 1 | 3  |
| <sup>a</sup> HLD-7 | -- | -- | -- | -- | -- | -- | 32.5±1.0  | -- | -- | 1 | 4  |
| HLD-10-1           | -- | -- | -- | -- | -- | -- | 40.3±0.3  | -- | -- | 1 | 15 |
| HLD-10-2           | -- | -- | -- | -- | -- | -- | 42.3±0.4  | -- | -- | 1 | 16 |
| HLD-10-3           | -- | -- | -- | -- | -- | -- | 42.8±0.5  | -- | -- | 1 | 17 |
| HLD-10-4           | -- | -- | -- | -- | -- | -- | 45.6±0.7  | -- | -- | 1 | 18 |
| HLD-8(1)           | -- | -- | -- | -- | -- | -- | 85.7±2.8  | -- | -- | 2 | 30 |
| HLD-8(2)           | -- | -- | -- | -- | -- | -- | 76.1±1.8  | -- | -- | 2 | 30 |
| HLD-9-1            | -- | -- | -- | -- | -- | -- | 92.4±2.1  | -- | -- | 2 | 32 |
| HLD-9-2            | -- | -- | -- | -- | -- | -- | 81.4±1.1  | -- | -- | 2 | 32 |
| HLD-1              | -- | -- | -- | -- | -- | -- | 96.8±1.0  | -- | -- | 2 | 58 |
| HLD-2              | -- | -- | -- | -- | -- | -- | 102.1±0.9 | -- | -- | 2 | 60 |
| HLD-12             | -- | -- | -- | -- | -- | -- | 99.3±1.6  | -- | -- | 2 | 70 |
| HLD-13             | -- | -- | -- | -- | -- | -- | 99.5±2.2  | -- | -- | 2 | 75 |
| HLD-3              | -- | -- | -- | -- | -- | -- | 55.0±1.1  | -- | -- | 1 | 45 |
| HLD-4              | -- | -- | -- | -- | -- | -- | 78.7±1.2  | -- | -- | 1 | 52 |
| HLD-5              | -- | -- | -- | -- | -- | -- | 79.1±0.7  | -- | -- | 1 | 62 |

**Luna Cave (Ref. 21)**

|         |    |    |    |    |    |    |           |    |    |   |    |
|---------|----|----|----|----|----|----|-----------|----|----|---|----|
| LN12-03 | -- | -- | -- | -- | -- | -- | 126.9±1.5 | -- | -- | 3 | 75 |
| LN12-07 | -- | -- | -- | -- | -- | -- | 70.2±1.4  | -- | -- | 3 | 75 |

**Fuyan Cave (Ref. 22)**

|        |    |    |    |    |    |    |           |    |    |            |    |
|--------|----|----|----|----|----|----|-----------|----|----|------------|----|
| FYS-S1 | -- | -- | -- | -- | -- | -- | 80.1±1.2  | -- | -- | IID/layer1 | 0  |
| FYS-S2 | -- | -- | -- | -- | -- | -- | 79.5±2.8  | -- | -- | IID/layer1 | 0  |
| FYS-1  | -- | -- | -- | -- | -- | -- | 158.3±4.6 | -- | -- | IIA/layer2 | 10 |

|       |    |    |    |    |    |    |            |    |    |            |    |
|-------|----|----|----|----|----|----|------------|----|----|------------|----|
| FYS-2 | -- | -- | -- | -- | -- | -- | 121.0±1.5  | -- | -- | IIA/layer2 | 10 |
| FYS-3 | -- | -- | -- | -- | -- | -- | 556.8±61.9 | -- | -- | IC/layer2  | 20 |
| FYS-4 | -- | -- | -- | -- | -- | -- | 120.7±0.9  | -- | -- | IB/layer2  | 50 |
| FYS-5 | -- | -- | -- | -- | -- | -- | 348.3±8.2  | -- | -- | IB/layer2  | 50 |
| FYS-6 | -- | -- | -- | -- | -- | -- | 141.8±12.1 | -- | -- | IA/layer2  | 60 |
| FYS-7 | -- | -- | -- | -- | -- | -- | 192.9±4.3  | -- | -- | IID/layer2 | 10 |
| FYS-8 | -- | -- | -- | -- | -- | -- | 140.7±5.2  | -- | -- | IID/layer2 | 20 |

U decay constants:  $\lambda_{238} = 1.55125 \times 10^{-10}$  (Ref. 102) and  $\lambda_{234} = 2.82206 \times 10^{-6}$  (Ref. 83). Th decay constant:  $\lambda_{230} = 9.1705 \times 10^{-6}$  (Ref. 83).

\* $\delta^{234}\text{U} = ([^{234}\text{U}/^{238}\text{U}] \text{ activity} - 1) \times 1000$ . \*\* $\delta^{234}\text{U}_{\text{initial}}$  was calculated based on  $^{230}\text{Th}$  age (T), i.e.,  $\delta^{234}\text{U}_{\text{initial}} = \delta^{234}\text{U}_{\text{measured}} \times e^{\lambda_{234} \times T}$ .

Corrected  $^{230}\text{Th}$  ages assume the initial  $^{230}\text{Th}/^{232}\text{Th}$  atomic ratio of  $4.4 \pm 2.2 \times 10^{-6}$ . Those are the values for a material at secular

equilibrium, with the bulk earth  $^{232}\text{Th}/^{238}\text{U}$  value of 3.8. The errors are arbitrarily assumed to be 50%.

\*\*\*B.P. stands for "Before Present" where the "Present" is defined as the year 1950 A.D.

**Table S3.** Results of all AMS <sup>14</sup>C dating of mammal tooth and bone, human remains and charcoal samples from Huanglong Cave (1), Luna Cave (2), Fuyan Cave (3), Yangjiapo Cave (4), Sanyou Cave (5). “#” denotes that the graphite target was too weak due to small sample amount so that the sample age is older than the true age and the date is unreliable (we do not give provide Calendric age in such instances). The shaded zone indicates the AMS <sup>14</sup>C ages of the different components from the same tooth. TOC = Total Organic Carbon. pMC = percent of Modern Carbon (in 1σ error).

| Lab Code              | Sample ID | Material | Faunas identified          | Type     | pMC (%)    | <sup>14</sup> C Age (yr BP) | Calendric age (yr BP) | 68% Cal age range (yr BP) | N%   | C%   | C/N  | δ <sup>15</sup> N (air) | δ <sup>13</sup> C (VPDB) | Depth (cm) |
|-----------------------|-----------|----------|----------------------------|----------|------------|-----------------------------|-----------------------|---------------------------|------|------|------|-------------------------|--------------------------|------------|
| <b>Huanglong Cave</b> |           |          |                            |          |            |                             |                       |                           |      |      |      |                         |                          |            |
| NTUAMS-5062-D         | HLD-1     | Tooth    | <i>Bubalus bubalis</i>     | TOC      | 29.45±0.28 | 9820±75                     | 11260±70              | 11200 - 11330             | 0.09 | 1.11 | 11.1 | -                       | -                        | 95         |
| NTUAMS-5056-D         | HLD-2     | Tooth    | <i>Bubalus bubalis</i>     | TOC      | 21.32±0.21 | 12414±80                    | 14650±350             | 14300 - 15000             | 0.07 | 0.89 | 10.5 | -                       | -                        | 90         |
| NTUAMS-5122-A         | HLD-3#    | Tooth    | <i>Rhinoceros sinensis</i> | Collagen | 6.58±0.80  | 21854±976                   | -                     | -                         | -    | -    | -    | -                       | -                        | 85         |
| NTUAMS-5122-D         | HLD-3     | Tooth    | <i>Rhinoceros sinensis</i> | TOC      | 8.51±0.15  | 19789±137                   | 23710±320             | 23400 - 24020             | 0.04 | 2    | 58.3 | -                       | -7.54                    | 85         |
| NTUAMS-5123-A         | HLD-4     | Tooth    | <i>Bubalus bubalis</i>     | Collagen | 53.23±0.42 | 5065±64                     | 5820±80               | 5740 - 5890               | -    | -    | -    | -                       | -                        | 30         |
| NTUAMS-5123-D         | HLD-4     | Tooth    | <i>Bubalus bubalis</i>     | TOC      | 57.71±0.61 | 4416±85                     | 5080±160              | 4920 - 5230               | 0.23 | 1.6  | 8.1  | 3.57                    | -20.33                   | 30         |
| NTUAMS-5223-A         | HLD-5     | Tooth    | <i>Bubalus bubalis</i>     | Collagen | 54.04±0.58 | 4944±86                     | 5730±110              | 5620 - 5840               | -    | -    | -    | -                       | -                        | 50         |
| NTUAMS-5223-D         | HLD-5     | Tooth    | <i>Bubalus bubalis</i>     | TOC      | 57.19±0.46 | 4489±65                     | 5140±120              | 5020 - 5260               | 0.48 | 2.1  | 5.1  | 3.84                    | -20.42                   | 50         |
| NTUAMS-5157-D         | HLD-6     | Tooth    | <i>Bubalus bubalis</i>     | TOC      | 30.73±0.29 | 9478±76                     | 10830±180             | 10650 - 11010             | 0.14 | 1.2  | 10.0 | -                       | -12.62                   | 98         |
| NTUAMS-5239-D         | HLD-7     | Tooth    | <i>Rhinoceros sinensis</i> | TOC      | 8.78±0.13  | 19544±119                   | 23340±350             | 22990 - 23690             | 0.08 | 0.3  | 4.4  | -                       | -17.78                   | 100        |
| NTUAMS-5240-D         | HLD-8     | Tooth    | <i>Bubalus bubalis</i>     | TOC      | 8.94±0.14  | 19395±125                   | 23170±300             | 22870 - 23470             | 0.09 | 0.5  | 6.5  | -                       | -                        | 85         |
| NTUAMS-5171-A         | HLD-9     | Tooth    | <i>Cervus sp.</i>          | Collagen | 2.45±0.06  | 29806±188                   | 34120±220             | 33910 - 34340             | -    | -    | -    | -                       | -                        | 85         |
| NTUAMS-5171-D         | HLD-9     | Tooth    | <i>Cervus sp.</i>          | TOC      | 18.83±0.21 | 13413±89                    | 16370±430             | 15930 - 16780             | 0.27 | 2.44 | 10.5 | 6.66                    | -15.38                   | 85         |
| NTUAMS-5245-D         | HLD-10-1  | Tooth    | <i>Bubalus bubalis</i>     | TOC      | 38.18±0.42 | 7735±89                     | 8530±90               | 8450 - 8620               | 0.09 | 0.9  | 11.7 | -                       | -                        | 90         |
| NTUAMS-5063-D         | HLD-11    | Tooth    | <i>Bubalus bubalis</i>     | TOC      | 6.53±0.11  | 21926±131                   | 26320±390             | 25940 - 26700             | 0.10 | 0.46 | 5.5  | -                       | -13.51                   | 65         |
| NTUAMS-5124-A         | HLD-30    | Tooth    | <i>Bubalus bubalis</i>     | Collagen | 5.34±0.09  | 23536±142                   | 28460±360             | 28100 - 28810             | -    | -    | -    | -                       | -                        | 30         |
| NTUAMS-5124-D         | HLD-30    | Tooth    | <i>Bubalus bubalis</i>     | TOC      | 15.65±0.20 | 14901±102                   | 18210±260             | 17950 - 18460             | 0.55 | 3.5  | 7.4  | 4.62                    | -16.39                   | 30         |
| NTUAMS-5125-A         | HLD-45    | Bone     | Unidentified               | Collagen | 27.53±0.59 | 10361±173                   | 12180±340             | 11840 - 12510             | -    | -    | -    | -                       | -                        | 45         |

|                   |               |          |                   |          |                |                |           |               |      |      |      |      |        |    |
|-------------------|---------------|----------|-------------------|----------|----------------|----------------|-----------|---------------|------|------|------|------|--------|----|
| NTUAMS-5125-D     | HLD-45        | Bone     | Unidentified      | TOC      | 29.01±0.36     | 9940±100       | 11470±180 | 11300 - 11640 | 0.10 | 2.7  | 31.5 | 2.24 | -11.88 | 45 |
| Beta-516671       | HL-16         | Charcoal | -                 | TOC      | 2.05±0.04      | 31230±170      | 35130±405 | 34850 - 35540 | -    | -    | -    | -    | -24.3  | 16 |
| Beta-516673       | HL-31         | Charcoal | -                 | TOC      | 2.32±0.05      | 30230±180      | 34265±360 | 34250 - 34570 | -    | -    | -    | -    | -25.0  | 31 |
| Beta-516674       | HL-47         | Charcoal | -                 | TOC      | 2.66±0.05      | 29130±150      | 33330±400 | 33290 - 33920 | -    | -    | -    | -    | -23.1  | 47 |
| <b>Luna Cave</b>  |               |          |                   |          |                |                |           |               |      |      |      |      |        |    |
| NTUAMS-5057-D     | LND-B-60-70-1 | Tooth    | Bovidae           | TOC      | 41.61±0.35     | 7044±67        | 7880±70   | 7810 - 7940   | 0.09 | 1.27 | 15.9 | -    | -      | 50 |
| NTUAMS-5058-D     | LND-B-60-70-2 | Tooth    | Bovidae           | TOC      | 41.42±0.32     | 7080±63        | 7910±60   | 7850 - 7970   | 0.08 | 0.97 | 13.9 | -    | -      | 50 |
| NTUAMS-5115-A     | LND-C-4-1#    | Tooth    | <i>Sus scrofa</i> | Collagen | 18.63±1.77     | 13497±764      | -         | -             | 0.08 | 4.6  | 67.1 | -    | -22.98 | 40 |
| NTUAMS-5116-D     | LND-C-4-2     | Tooth    | <i>Sus scrofa</i> | TOC      | 60.06±0.51     | 4095±68        | 4650±130  | 4530 - 4780   | 0.03 | 0.8  | 31.1 | -    | -14.30 | 40 |
| NTUAMS-5117-D     | LND-C-4-3     | Bone     | <i>Sus scrofa</i> | TOC      | 54.55±0.50     | 4868±74        | 5610±100  | 5510 - 5700   | 0.03 | 1.3  | 50.6 | -    | -10.68 | 40 |
| NTUAMS-5118-D     | LND-C-6-1     | Tooth    | <i>Cervus sp.</i> | TOC      | 45.90±0.36     | 6255±62        | 7160±90   | 7070 - 7250   | 0.03 | 1.1  | 42.8 | -    | -10.27 | 60 |
| NTUAMS-5119-A     | LND-C-6-2     | Tooth    | <i>Cervus sp.</i> | Collagen | 48.67±0.58     | 5785±96        | 6600±110  | 6490 - 6710   | -    | -    | -    | -    | -      | 60 |
| NTUAMS-5119-D     | LND-C-6-2     | Tooth    | <i>Cervus sp.</i> | TOC      | 37.76±0.38     | 7824±81        | 8670±130  | 8540 - 8790   | 0.04 | 1    | 29.2 | -    | -7.96  | 60 |
| NTUAMS-5120-D     | LND-C-6-3     | Tooth    | <i>Sus scrofa</i> | TOC      | 20.44±0.24     | 12755±95       | 15180±320 | 14860 - 15500 | 0.02 | 0.5  | 29.2 | -    | -14.03 | 70 |
| NTUAMS-5121-A     | LND-C-6-4     | Tooth    | <i>Sus scrofa</i> | Collagen | 34.84±0.32     | 8470±74        | 9480±60   | 9420 - 9530   | -    | -    | -    | -    | -      | 70 |
| NTUAMS-5121-D     | LND-C-6-4     | Tooth    | <i>Sus scrofa</i> | TOC      | 50.90±0.58     | 5424±92        | 6190±120  | 6070 - 6300   | 0.1  | 2    | 23.3 | 6.79 | -11.98 | 70 |
| NTUAMS-5246-D     | LND-C-8-1     | Tooth    | <i>Sus scrofa</i> | TOC      | 50.52±0.57     | 5486±91        | 6290±100  | 6190 - 6380   | 0.11 | 1.45 | 15.4 | -    | -13.10 | 90 |
| NTUAMS-5247-D     | LND-C-8-2     | Tooth    | <i>Sus scrofa</i> | TOC      | 34.40±0.32     | 8572±75        | 9580±70   | 9510 - 9640   | 0.1  | 2.1  | 24.5 | -    | -13.03 | 90 |
| NTUAMS-5141-A     | LND-C-8-3#    | Bone     | Unidentified      | Collagen | 5.17±1.03      | 23794±160<br>7 | -         | -             | -    | -    | -    | -    | -      | 90 |
| NTUAMS-5141-D     | LND-C-8-3     | Bone     | Unidentified      | TOC      | 28.95±0.40     | 9958±110       | 11500±200 | 11300 - 11690 | 0.10 | 3.98 | 47.1 | -    | -10.11 | 90 |
| Beta-516677       | LN-2-22       | Charcoal | -                 | TOC      | 60.10±0.22     | 4090±30        | 4660±130  | 4550 - 4780   | -    | -    | -    | -    | 28.8   | 22 |
| Beta-516676       | LN-2-28       | Charcoal | -                 | TOC      | 46.22±0.17     | 6200±30        | 7095±75   | 7040 - 7160   | -    | -    | -    | -    | -      | 28 |
| <b>Fuyan Cave</b> |               |          |                   |          |                |                |           |               |      |      |      |      |        |    |
| NTUAMS-5220b-D    | FY5-5         | Tooth    | <i>Cervus sp.</i> | TOC      | 45.59±0.24     | 6311±72        | 7250±80   | 7170 - 7320   | 0.1  | 1.7  | 19.8 | -    | -      | 15 |
| NTUAMS-5290-D     | FY1-1         | Tooth    | <i>Cervus sp.</i> | TOC      | 43.86±0.42     | 6620±76        | 7520±60   | 7460 - 7570   | 0.03 | 1.01 | 39.3 | -    | -9.58  | 35 |
| NTUAMS-5215-D     | FY1-6         | Tooth    | <i>Cervus sp.</i> | TOC      | 38.52±0.33     | 7664±68        | 8480±60   | 8420 - 8540   | 0.1  | 0.9  | 10.5 | -    | -11.01 | 35 |
| NTUAMS-5291-A     | FY3-1         | Tooth    | <i>Cervus sp.</i> | Collagen | 23.65<br>±0.43 | 11583±426      | 13640±540 | 13350 - 13590 | -    | -    | -    | -    | -      | 20 |

|                        |             |          |                            |          |            |            |           |               |      |      |      |       |        |      |
|------------------------|-------------|----------|----------------------------|----------|------------|------------|-----------|---------------|------|------|------|-------|--------|------|
| NTUAMS-5291-D          | FY3-1       | Tooth    | <i>Cervus sp.</i>          | TOC      | 23.65±0.19 | 11583±65   | 13470±120 | 13350 - 13590 | -    | -    | -    | 6.64  | -17.94 | 20   |
| NTUAMS-5216-D          | FY3-3       | Tooth    | <i>Cervus sp.</i>          | TOC      | 35.00±0.29 | 8432±67    | 9440±80   | 9360 - 9510   | -    | -    | -    | -     | -13.43 | 37   |
| NTUAMS-5217-A          | FY3-5       | Tooth    | <i>Sus scrofa</i>          | Collagen | 35.68±0.33 | 8278±75    | 9270±120  | 9160 - 9390   | -    | -    | -    | -     | -      | 30   |
| NTUAMS-5217-D          | FY3-5       | Tooth    | <i>Sus scrofa</i>          | TOC      | 35.48±0.34 | 8323±78    | 9320±120  | 9200 - 9430   | 0.13 | 0.6  | 5.4  | 6.42  | -17.21 | 30   |
| NTUAMS-5292-D          | FY5-1       | Tooth    | <i>Cervus sp.</i>          | TOC      | 35.30±0.34 | 8364±77    | 9370±90   | 9280 - 9460   | 0.4  | 1.7  | 5.0  | -     | -13.83 | 15   |
| NTUAMS-5218-D          | FY5-2       | Tooth    | <i>Cervus sp.</i>          | TOC      | 51.41±0.31 | 5345±48    | 6130±90   | 6050 - 6210   | -    | -    | -    | -     | -9.47  | 33   |
| NTUAMS-5219-D          | FY5-3       | Tooth    | <i>Hystrix subcristata</i> | TOC      | 27.44±0.27 | 10387±79   | 12310±200 | 12110 - 12510 | 0.1  | 0.7  | 8.2  | -     | -10.12 | 35   |
| NTUAMS-5310-D          | DX5-4 10-20 | Tooth    | <i>Cervus sp.</i>          | TOC      | 39.61±0.38 | 7439±76    | 8270±80   | 8200 - 8340   | -    | -    | -    | -     | -      | 15   |
| NTUAMS-5311-D          | DX1-2 20-30 | Tooth    | <i>Cervus sp.</i>          | TOC      | 33.13±0.24 | 8873±59    | 9990±140  | 9860 - 10130  | -    | -    | -    | -     | -      | 25   |
| NTUAMS-5276-D          | FY-8        | Tooth    | <i>Sus scrofa</i>          | TOC      | 20.79±0.22 | 12618±86   | 14980±320 | 14660 - 15290 | -    | -    | -    | -     | -      | 40   |
| NTUAMS-5308-D          | FY-10       | Tooth    | <i>Hystrix subcristata</i> | TOC      | 23.00±0.25 | 11805±88   | 13720±150 | 13570 - 13870 | -    | -    | -    | -     | -      | 40   |
| NTUAMS-5309-D          | FY-11       | Tooth    | <i>Cervus sp.</i>          | TOC      | 29.57±0.27 | 9787±72    | 11210±60  | 11150 - 11260 | -    | -    | -    | -     | -      | 40   |
| Beta-516145            | DX-1        | Charcoal | -                          | TOC      | 68.49±0.26 | 3040±30    | 3255±90   | 3230 - 3330   | -    | -    | -    | -     | -29.6  | 13   |
| Beta-516147            | DX-3        | Charcoal | -                          | TOC      | 61.46±0.23 | 3910±30    | 4335±87   | 4300 - 4410   | -    | -    | -    | -     | -25.8  | 15   |
| NTUAMS-5260b-D         | FY-HT-1     | tooth    | <i>Homo sapiens</i>        | TOC      | 74.34±0.58 | 2382±63    | 2510±140  | 2370 - 2640   | 0.6  | 2.3  | 4.5  | -     | -7.53  | 20   |
| NTUAMS-5260-D          | FY-HT-1     | tooth    | <i>Homo sapiens</i>        | TOC      | 73.88±0.57 | 2432±62    | 2540±130  | 2410 - 2670   | 0.6  | 2.3  | 4.5  | -     | -7.53  | 20   |
| NTUAMS-5259-D          | FY-HT-2     | tooth    | <i>Homo sapiens</i>        | TOC      | 35.27±0.35 | 8372±80    | 9380±90   | 9290 - 9470   | 0.04 | 1.6  | 46.7 | 10.89 | -16.85 | 40   |
| <b>Yangjiapo Cave*</b> |             |          |                            |          |            |            |           |               |      |      |      |       |        |      |
| NTUAMS-5224-D          | YJP-600     | Tooth    | <i>Cervus sp.</i>          | TOC      | 22.91±0.38 | 11836±135  | 13760±200 | 13570 - 13960 | 0.35 | 2.13 | 7.1  | 5.23  | -16.98 | 28.5 |
| NTUAMS-5225-A          | YJP-1054    | Tooth    | <i>Cervus sp.</i>          | Collagen | 4.92±0.12  | 24189±195  | 28970±420 | 28550 - 29390 | -    | -    | -    | -     | -      | 40   |
| NTUAMS-5225-D          | YJP-1054    | Tooth    | <i>Cervus sp.</i>          | TOC      | 16.82±0.20 | 14320±95   | 17500±260 | 17240 - 17760 | 0.45 | 2.7  | 7.0  | 5.47  | -17.75 | 40   |
| NTUAMS-5061-A          | YJP-1241#   | Tooth    | Bovidae                    | Collagen | 14.06±1.82 | 15758±1038 | -         | -             | -    | -    | -    | -     | -      | 15   |
| NTUAMS-5061-D          | YJP-1241    | Tooth    | Bovidae                    | TOC      | 35.59±0.33 | 8300±74    | 9290±120  | 9170 - 9410   | 0.14 | 2.43 | 20.6 | 0.14  | -15.65 | 15   |
| NTUAMS-5226-D          | YJP-1458    | Tooth    | <i>Cervus sp.</i>          | TOC      | 27.00±0.45 | 10518±135  | 12400±230 | 12170 - 12630 | 0.22 | 2    | 10.6 | -     | -16.90 | 30   |
| NTUAMS-5064-D          | YJP-2041    | Tooth    | Bovidae                    | TOC      | 25.86±0.29 | 10864±90   | 12840±100 | 12740 - 12940 | 0.24 | 2.1  | 0.1  | -0.81 | -17.62 | 35   |
| NTUAMS-5065-D          | YJP-2306    | Tooth    | Bovidae                    | TOC      | 31.40±0.30 | 9306±77    | 10500±120 | 10380 - 10610 | 0.34 | 2.9  | 9.9  | -0.15 | -16.98 | 35   |
| NTUAMS-5227-D          | YJP-2560    | Tooth    | <i>Sus scrofa</i>          | TOC      | 13.21±0.24 | 16263±145  | 19450±350 | 19100 - 19800 | 0.1  | 0.74 | 8.6  | -     | -15.18 | 40   |

|                    |                  |       |                            |          |            |           |           |               |           |           |      |      |        |      |
|--------------------|------------------|-------|----------------------------|----------|------------|-----------|-----------|---------------|-----------|-----------|------|------|--------|------|
| NTUAMS-5228-D      | YJP-2670         | Tooth | Bovidae                    | TOC      | 21.77±0.24 | 12248±87  | 14350±300 | 14050 - 14640 | 0.16      | 1.15      | 8.4  | -    | -14.75 | 40   |
| NTUAMS-5254-D      | YJP-2777         | Tooth | <i>Sus scrofa</i>          | TOC      | 25.69±0.40 | 10916±125 | 12890±120 | 12760 - 13010 | 0.13      | 3.99      | 35.8 | -    | -14.36 | 35   |
| NTUAMS-5090-D      | YJP-2789         | Tooth | <i>Cervus sp.</i>          | TOC      | 25.14±0.25 | 11090±80  | 12990±130 | 12860 - 13120 | 0.21      | 2.09      | 11.6 | 3.14 | -16.90 | 25   |
| NTUAMS-5255-D      | YJP-2920         | Tooth | Bovidae                    | TOC      | 24.29±0.25 | 11367±83  | 13270±140 | 13130 - 13410 | 0.11<br>4 | 0.66<br>4 | 6.8  | -    | -14.87 | 10   |
| NTUAMS-5256-A      | YJP-2936         | Tooth | <i>Cervus sp.</i>          | Collagen | 63.77±0.54 | 3614±68   | 3950±100  | 3850 - 4050   | -         | -         | -    | -    | -      | 10   |
| NTUAMS-5256-D      | YJP-2936         | Tooth | <i>Cervus sp.</i>          | TOC      | 70.13±0.53 | 2850±61   | 2990±90   | 2900 - 3070   | 1.1       | 3.99      | 4.2  | 5.91 | -24.54 | 10   |
| NTUAMS-5257-D      | YJP-3091         | Tooth | <i>Rhinoceros sinensis</i> | TOC      | 21.92±0.19 | 12192±71  | 14240±240 | 13990 - 14480 | 0.18<br>5 | 1.75<br>5 | 11.1 | 4.10 | -14.92 | 50   |
| NTUAMS-5258-D      | YJP-3102         | Tooth | <i>Rhinoceros sinensis</i> | TOC      | 27.72±0.26 | 10306±75  | 12170±230 | 11940 - 12400 | 0.14<br>6 | 1.34<br>3 | 10.7 | -    | -14.19 | 42.5 |
| NTUAMS-5096-D      | YJP-3146         | Tooth | <i>Cervus sp.</i>          | TOC      | 14.32±0.28 | 15614±155 | 18900±260 | 18640 - 19160 | 0.06      | 1.56      | 30.3 | -    | -13.14 | 10   |
| NTUAMS-5268-D      | YJP-3147         | Tooth | <i>Hystrix subcristata</i> | TOC      | 28.17±0.24 | 10178±68  | 11840±190 | 11650 - 12020 | -         | -         | -    | -    | -      | 35   |
| Beta-436939        | S7W4-2           | Bone  | Unidentified               | Collagen | 33.60±0.13 | 8760±30   | 9765±140  | 9700 - 9850   | -         | -         | -    | -    | -24.4  | 30   |
| Beta-436940        | S13W15-1C        | Bone  | Unidentified               | Collagen | 58.55±0.22 | 4300±30   | 4895±70   | 4850 - 4900   | -         | -         | -    | -    | -27.1  | 30   |
| Beta-436943        | S13W15-1B        | Bone  | Unidentified               | Collagen | 16.59±0.06 | 14430±30  | 17600±175 | 17730 - 17820 | -         | -         | -    | -    | -24.7  | 10   |
| Beta-436944        | S7W10-1C         | Bone  | Unidentified               | Collagen | 1.66±0.05  | 32900±230 | 37060±775 | 36730 - 38050 | -         | -         | -    | 5.3  | -22.2  | 20   |
| Beta-436945        | S4W2-2           | Bone  | Unidentified               | Collagen | 62.54±0.23 | 3770±30   | 4120±120  | 4100 - 4210   | -         | -         | -    | 4.1  | -23.9  | 40   |
| Beta-436948        | S7W5-2           | Bone  | Unidentified               | Collagen | 47.56±0.18 | 5970±30   | 6815±85   | 6770 - 6860   | -         | -         | -    | 5.8  | -23.9  | 49   |
| Beta-436950        | S7W10-1C         | Bone  | Unidentified               | Collagen | 0.69±0.04  | 39960±460 | 43655±805 | 43090 - 44370 | -         | -         | -    | 6.2  | -24    | 20   |
| Beta-436951        | S6E1-2           | Bone  | Unidentified               | Collagen | 53.00±0.20 | 5100±30   | 5835±85   | 5780 - 5910   | -         | -         | -    | 4.2  | -25    | 24   |
| Beta-436952        | S9W11-1B         | Bone  | Unidentified               | Collagen | 56.61±0.21 | 4570±30   | 5255±195  | 5110 - 5320   | -         | -         | -    | 7.7  | -24.1  | 40   |
| Beta-436954        | S7W10-1B         | Bone  | Unidentified               | Collagen | 30.31±0.11 | 9590±30   | 10935±175 | 10830 - 11060 | -         | -         | -    | 5.8  | -25.5  | 10   |
| Beta-436956        | S16W19-1C        | Bone  | Unidentified               | Collagen | 21.33±0.11 | 12410±40  | 14495±310 | 14310 - 14970 | -         | -         | -    | 7.2  | -21.4  | 50   |
| Beta-470580        | HBJS-DCD-H-T-488 | tooth | <i>Homo sapiens</i>        | Collagen | 67.98±0.25 | 3100±30   | 3310±75   | 3280 - 3370   | -         | -         | -    | 10.9 | -10.7  | 35   |
| <b>Sanyou Cave</b> |                  |       |                            |          |            |           |           |               |           |           |      |      |        |      |
| Beta-471831        | HBYS-SYD-H-ZG    | Bone  | <i>Homo sapiens</i>        | TOC      | 80.22±0.30 | 1770±30   | 1710±105  | 1640 - 1730   | -         | -         | -    | -    | -      | 20   |

\*No collagen was extracted from some samples in Yangjiapo Cave including: S4W1-2, S6E1-2, S8W7-2, S6W9-2, S9W11-2, S4W2-2, S11W11-2, S13W12-1C\* and S16W19-1C\*.

**Table S4.** Comparison of AMS  $^{14}\text{C}$  and tip date in the same sample of human teeth from Fuyan Cave (3) and Yangjiapo Cave (4) and. AMS  $^{14}\text{C}$  dates are on different components: collagen and total organic carbon (TOC).

| ID                                  | $^{14}\text{C}$ Age Type | Calendric age (year BP) | Tip date (year BP) | Species | Layer | Depth (cm) |
|-------------------------------------|--------------------------|-------------------------|--------------------|---------|-------|------------|
| <b>Fuyan Cave (Human teeth)</b>     |                          |                         |                    |         |       |            |
| FY-1HT                              | TOC                      | 2510±140                | 3709               | Human   | 2     | 20         |
| FY-1HT                              | TOC                      | 2540±130                | 3709               | Human   | 2     | 20         |
| FY-2HT                              | TOC                      | 9380±90                 | 11977              | Human   | 2     | 40         |
| <b>Yangjiapo Cave (Human teeth)</b> |                          |                         |                    |         |       |            |
| HBJS-DCD-H-T-488                    | Collagen                 | 3310                    | 7561               | Human   | 2     | 35         |
